# Supplementary material
Source: HighWire-hosted journal article supplement (https://bmjopen.bmj.com/content/9/12/e031874)

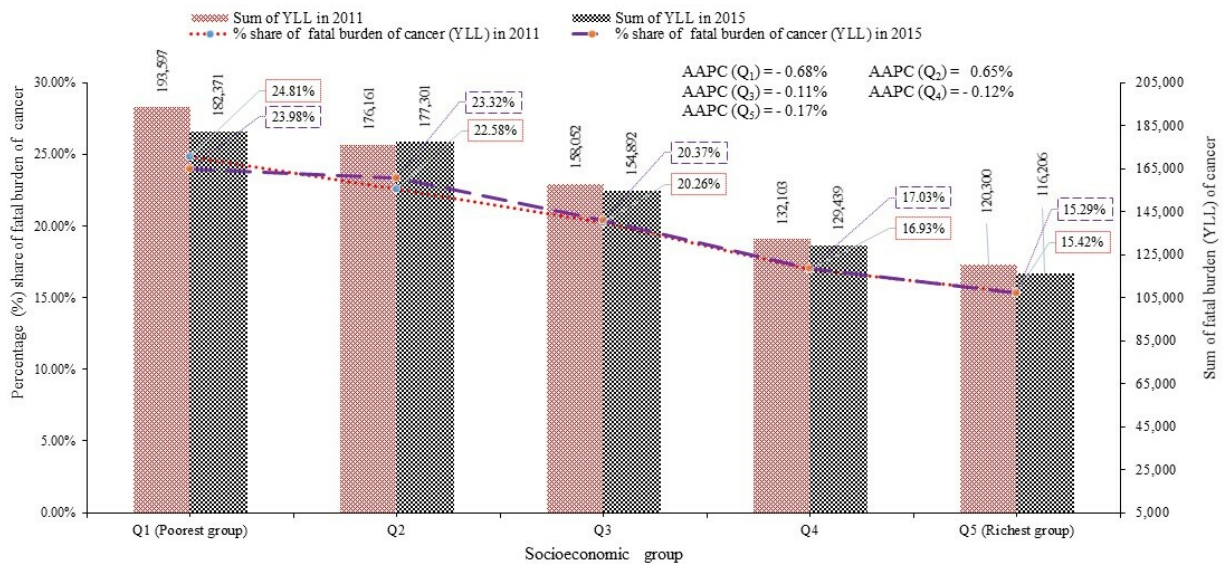

Note: YLL = Years life lost, AAPC = Average annual percentage change over the periods

Supplement: inline-supplementary-material-1 [file inline-supplementary-material-1.pdf]
